# Supplementary material for: Association of Sleep Disturbance With Longitudinal Cognitive Decline Among Cognitively Normal Elders
Source: Research Square preprint supplement (doi:10.21203/rs.3.rs-149162/v1), 2021-01-20
Supplement: Supplementary file 1 [file 9b10eda2cfff995f3e9f0271.docx]

Table S1. Summary Statistics for the Follow-up Time in Years.

| Group | N | Years (Means±Standard Deviation) |
| --- | --- | --- |
| Total | 463 | 9.56±6.82 |
| Sleep Disturbance | 357 | 8.47±6.14 |
| Normal Sleep | 106 | 12.16±7.61 |

Table S2. Time Linear Mixed-Effects Model of PACC (trails B).

| Fixed effects | Coef. | Std. Err. | *z* | *P* | *95% CI* | |
| --- | --- | --- | --- | --- | --- | --- |
|  |  |  |  |  |  |  |
| Education | 0.28 | 0.04 | 6.48 | <0.001 | 0.19 | 0.36 |
| Gender | -1.06 | 0.22 | -4.78 | <0.001 | -1.49 | -0.62 |
| Year | -0.17 | 0.01 | -24.32 | <0.001 | -0.18 | -0.15 |
| Sleep Disturbance | 1.80 | 0.31 | 5.82 | <0.001 | 1.19 | 2.41 |
| Sleep Disturbance*Year | -0.15 | 0.01 | -13.77 | <0.001 | -0.18 | -0.13 |
| Constant | -3.51 | 0.70 | -5.00 | <0.001 | -4.88 | -2.13 |

LR test vs. linear model: chi2(2) = 8411.95 *P* <0.001

AIC=15774

Table S3. Time Linear Mixed-Effects Model of MMSE.

| Fixed effects | Coef. | Std. Err. | z | *P* | *95% CI* | |
| --- | --- | --- | --- | --- | --- | --- |
|  |  |  |  |  |  |  |
| Education | 0.06 | 0.02 | 3.62 | <0.001 | 0.03 | 0.09 |
| Gender | -0.29 | 0.09 | -3.28 | 0.001 | -0.46 | -0.12 |
| Year | -0.05 | 0.00 | -13.85 | <0.001 | -0.06 | -0.05 |
| Sleep Disturbance | 0.94 | 0.15 | 6.09 | <0.001 | 0.64 | 1.24 |
| Sleep Disturbance*Year | -0.10 | 0.01 | -16.04 | <0.001 | -0.12 | -0.09 |
| Constant | 28.33 | 0.28 | 102.44 | <0.001 | 27.79 | 28.87 |

LR test vs. linear model: chi2(2) = 5340.85 *P* <0.001

AIC=12062

Table S4. Time Linear Mixed-Effects Model of LDELTOT.

| Fixed effects | Coef. | Std. Err. | z | *P* | *95% CI* | |
| --- | --- | --- | --- | --- | --- | --- |
|  |  |  |  |  |  |  |
| Education | 0.37 | 0.05 | 7.25 | <0.001 | 0.27 | 0.47 |
| Gender | -0.87 | 0.26 | -3.29 | 0.001 | -1.38 | -0.35 |
| Year | -0.10 | 0.01 | -13.95 | <0.001 | -0.11 | -0.08 |
| Sleep Disturbance | 0.64 | 0.30 | 2.12 | 0.034 | 0.05 | 1.24 |
| Sleep Disturbance*Year | <0.01 | 0.01 | 0.00 | 0.999 | -0.02 | 0.02 |
| Constant | 8.08 | 0.84 | 9.60 | <0.001 | 6.43 | 9.73 |

LR test vs. linear model: chi2(2) = 8911.44 *P* <0.001

AIC=13919

Table S5. Time Linear Mixed-Effects Model of ADAS13.

| Fixed effects | Coef. | Std. Err. | z | *P* | *95% CI* | |
| --- | --- | --- | --- | --- | --- | --- |
|  |  |  |  |  |  |  |
| Education | -0.13 | 0.07 | -1.91 | 0.057 | -0.27 | 0.00 |
| Gender | 1.36 | 0.36 | 3.74 | <0.001 | 0.65 | 2.07 |
| Year | 0.49 | 0.01 | 46.56 | <0.001 | 0.47 | 0.51 |
| Sleep Disturbance | -3.97 | 0.47 | -8.48 | <0.001 | -4.88 | -3.05 |
| Sleep Disturbance*Year | 0.20 | 0.02 | 11.51 | <0.001 | 0.16 | 0.23 |
| Constant | 10.37 | 1.15 | 9.01 | <0.001 | 8.12 | 12.63 |

LR test vs. linear model: chi2(2) = 8099.26 *P* <0.001

AIC=18589

Table S6. Time Linear Mixed-Effects Model of CDRSB.

| Fixed effects | Coef. | Std. Err. | z | *P* | *95% CI* | |
| --- | --- | --- | --- | --- | --- | --- |
| Year | 0.05 | 0.00 | 17.02 | <0.001 | 0.04 | 0.05 |
| Sleep Disturbance | -0.81 | 0.13 | -6.20 | <0.001 | -1.06 | -0.55 |
| Sleep Disturbance*Year | 0.11 | 0.00 | 23.71 | <0.001 | 0.10 | 0.12 |
| Constant | -0.07 | 0.03 | -2.31 | 0.021 | -0.14 | -0.01 |

LR test vs. linear model: chi2(2) = 6989.24 *P* <0.001

AIC=10458

Table S7. Time Linear Mixed-Effects Model of Ventricles ICV.

| Fixed effects | Coef. | Std. Err. | z | *P* | *95% CI* | |
| --- | --- | --- | --- | --- | --- | --- |
|  |  |  |  |  |  |  |
| Gender | 0.68 | 0.16 | 4.14 | <0.001 | 0.36 | 1.00 |
| Year | 0.09 | 0.00 | 55.55 | <0.001 | 0.09 | 0.09 |
| Sleep Disturbance | -0.06 | 0.07 | -0.92 | 0.358 | -0.19 | 0.07 |
| Sleep Disturbance*Year | 0.01 | 0.00 | 5.04 | <0.001 | 0.01 | 0.02 |
| Constant | 2.84 | 0.12 | 24.58 | <0.001 | 2.61 | 3.06 |

LR test vs. linear model: chi2(2) = 15991.66 *P* <0.001

AIC=2023

Table S8. Time Linear Mixed-Effects Model of Hippocampus ICV.

| Fixed effects | Coef. | Std. Err. | z | *P* | *95% CI* | |
| --- | --- | --- | --- | --- | --- | --- |
|  |  |  |  |  |  |  |
| Education | 0.00 | 0.00 | -2.24 | 0.025 | -0.01 | 0.00 |
| Gender | -0.02 | 0.01 | -3.37 | 0.001 | -0.03 | -0.01 |
| Year | 0.00 | 0.00 | -24.61 | <0.001 | 0.00 | 0.00 |
| Sleep Disturbance | -0.01 | 0.00 | -1.65 | 0.098 | -0.01 | 0.00 |
| Sleep Disturbance*Year | 0.00 | 0.00 | 1.52 | 0.128 | 0.00 | 0.00 |
| Constant | 0.78 | 0.02 | 39.74 | <0.001 | 0.74 | 0.82 |

LR test vs. linear model: chi2(2) = 11295.86 *P* <0.001

AIC=-7460

Table S9. Time Linear Mixed-Effects Model of ABETA.

| Fixed effects | Coef. | Std. Err. | z | *P* | *95% CI* | |
| --- | --- | --- | --- | --- | --- | --- |
|  |  |  |  |  |  |  |
| APOE4 | -314.71 | 41.11 | -7.65 | <0.001 | -395.29 | -234.12 |
| Year | -9.55 | 1.01 | -9.47 | <0.001 | -11.52 | -7.57 |
| Sleep Disturbance | -29.93 | 25.34 | -1.18 | 0.238 | -79.60 | 19.74 |
| Sleep Disturbance*Year | 6.51 | 1.81 | 3.61 | <0.001 | 2.97 | 10.05 |
| Constant | 1315.87 | 24.83 | 53.00 | <0.001 | 1267.21 | 1364.53 |

LR test vs. linear model: chi2(2) = 2908.92 *P* <0.001

AIC=12260

Table S10. Time Linear Mixed-Effects Model of TAU.

| Fixed effects | Coef. | Std. Err. | z | *P* | *95% CI* | |
| --- | --- | --- | --- | --- | --- | --- |
|  |  |  |  |  |  |  |
| APOE4 | 20.43 | 9.39 | 2.17 | 0.030 | 2.02 | 38.84 |
| Year | 2.53 | 0.16 | 15.89 | <0.001 | 2.22 | 2.84 |
| Sleep Disturbance | 2.26 | 6.05 | 0.37 | 0.709 | -9.60 | 14.11 |
| Sleep Disturbance*Year | 0.51 | 0.29 | 1.76 | 0.078 | -0.06 | 1.09 |
| Constant | 227.51 | 5.65 | 40.24 | <0.001 | 216.43 | 238.60 |

LR test vs. linear model: chi2(2) = 3934.52 *P* <0.001

AIC=9206.6

Table S11. Time Linear Mixed-Effects Model of P-TAU.

| Fixed effects | Coef. | Std. Err. | z | *P* | *95% CI* | |
| --- | --- | --- | --- | --- | --- | --- |
|  |  |  |  |  |  |  |
| APOE4 | 3.03 | 0.97 | 3.11 | 0.002 | 1.12 | 4.94 |
| Year | 0.30 | 0.02 | 17.98 | <0.001 | 0.27 | 0.33 |
| Sleep Disturbance | 0.33 | 0.66 | 0.51 | 0.613 | -0.96 | 1.62 |
| Sleep Disturbance*Year | <0.01 | 0.03 | -0.01 | 0.994 | -0.06 | 0.06 |
| Constant | 20.39 | 0.59 | 34.72 | <0.001 | 19.24 | 21.54 |

LR test vs. linear model: chi2(2) = 4072.69 *P* <0.001

AIC=5144.3

Table S12. Time Linear Mixed-Effects Model of FDG.

| Fixed effects | Coef. | Std. Err. | z | *P* | *95% CI* | |
| --- | --- | --- | --- | --- | --- | --- |
|  |  |  |  |  |  |  |
| Family History of AD | 0.01 | 0.01 | 1.20 | 0.228 | -0.01 | 0.04 |
| Gender | -0.02 | 0.01 | -2.13 | 0.034 | -0.04 | 0.00 |
| Year | -0.01 | 0.00 | -17.07 | <0.001 | -0.01 | 0.00 |
| Sleep Disturbance | 0.00 | 0.01 | -0.06 | 0.951 | -0.02 | 0.02 |
| Sleep Disturbance*Year | 0.00 | 0.00 | -1.66 | 0.097 | 0.00 | 0.00 |
| Constant | 1.33 | 0.01 | 155.92 | <0.001 | 1.31 | 1.34 |

LR test vs. linear model: chi2(2) = 3700.89 *P* <0.001

AIC=-2219.6

Table S13. Time Linear Mixed-Effects Model of AV45.

| Fixed effects | Coef. | Std. Err. | z | *P* | *95% CI* | |
| --- | --- | --- | --- | --- | --- | --- |
|  |  |  |  |  |  |  |
| Gender | -0.04 | 0.02 | -2.37 | 0.018 | -0.07 | -0.01 |
| APOE4 | 0.10 | 0.02 | 6.39 | <0.001 | 0.07 | 0.13 |
| Year | 0.00 | 0.00 | 15.03 | <0.001 | 0.00 | 0.00 |
| Sleep Disturbance | 0.00 | 0.01 | -0.20 | 0.839 | -0.02 | 0.02 |
| Sleep Disturbance*Year | 0.00 | 0.00 | 1.01 | 0.310 | 0.00 | 0.00 |
| Constant | 1.10 | 0.01 | 86.94 | <0.001 | 1.07 | 1.12 |

LR test vs. linear model: chi2(2) = 11142.61 *P* <0.001

AIC=-3706.3

Table S14. Time Linear Mixed-Effects Model of cognitive profiles in the participants without elevated CSF beta.

| Continuous time Models | Sleep Disturbance | | Year | | Sleep Disturbance*Year | |
| --- | --- | --- | --- | --- | --- | --- |
| Cognitive Profiles | *Beta (95%CI)* | *P-Value* | *Beta (95%CI)* | *P-Value* | *Beta (95%CI)* | *P-Value* |
| PACC (z score composite) a | 1.73 (1.12, 2.34) | ＜0.001 | -0.17 (-0.18, -0.15) | ＜0.001 | -0.15 (-0.18, -0.13) | ＜0.001 |
| MMSE a | 0.92 (0.61, 1.22) | ＜0.001 | -0.05 (-0.06, -0.05) | ＜0.001 | -0.10 (-0.12, -0.09) | ＜0.001 |
| Logical Memory Delayed Recall a | 0.55 (-0.05, 1.15) | 0.071 | -0.10 (-0.11, -0.08) | ＜0.001 | 0.00 (-0.02, 0.02) | 0.861 |
| CDR-Sum of Boxes a | -0.81 (-1.06, -0.55) | ＜0.001 | 0.05 (0.04, 0.05) | ＜0.001 | 0.11 (0.10, 0.12) | ＜0.001 |

a Model was adjusted for gender and education which were selected by AIC.

Table S15. Time Linear Mixed-Effects Model of amyloid markers Profiles and FDG in the participants without elevated CSF beta.

| Continuous time Models | Sleep Disturbance | | Year | | Sleep Disturbance*Year | |
| --- | --- | --- | --- | --- | --- | --- |
| Amyloid markers and FDG | *Beta (95%CI)* | *P-Value* | *Beta (95%CI)* | *P-Value* | *Beta (95%CI)* | *P-Value* |
| CSF Aβ42 a | -31.40 (-81.12, 18.32) | 0.216 | -9.54 (-11.51, -7.56) | ＜0.001 | 6.50 (2.96, 10.03) | ＜0.001 |
| Amyloid PET SUVR b | 0.00 (-0.02, 0.02) | 0.809 | 0.00 (0.00, 0.00) | ＜0.001 | 0.00 (0.00, 0.00) | 0.305 |
| FDG c | 0.00 (-0.02, 0.02) | 0.974 | -0.01 (-0.01, 0.00) | ＜0.001 | 0.00 (0.00, 0.00) | 0.091 |

a Model was adjusted for APOE4 which were selected by AIC.

b Model was adjusted for gender which were selected by AIC.

c Model was adjusted for gender andFamily History of AD4 which were selected by AIC.

Table S16. Time Linear Mixed-Effects Model of Neurodegeneration Profiles in the participants without elevated CSF beta.

| Continuous time Models | Sleep Disturbance | | Year | | Sleep Disturbance*Year | |
| --- | --- | --- | --- | --- | --- | --- |
| Neurodegeneration Profiles | *Beta (95%CI)* | *P-Value* | *Beta (95%CI)* | *P-Value* | *Beta (95%CI)* | *P-Value* |
| CSF t-Tau a | 2.05 (-9.82, 13.93) | 0.735 | 2.53 (2.22, 2.84) | ＜0.001 | 0.52 (-0.05, 1.09) | 0.076 |
| CSF p-Tau a | 0.34 (-0.95, 1.63) | 0.609 | 0.30 (0.27, 0.33) | ＜0.001 | 0.00 (-0.06, 0.06) | 0.999 |
| Hippocampal Volume b | -0.01 (-0.01, 0.00) | 0.090 | 0.00 (0.00, 0.00) | ＜0.001 | 0.00 (0.00, 0.00) | 0.129 |
| Ventricular Volume c | -0.06 (-0.19, 0.07) | 0.342 | 0.09 (0.09, 0.09) | ＜0.001 | 0.01 (0.01, 0.02) | ＜0.001 |

a Model was adjusted for APOE4 which were selected by AIC.

b Model was adjusted for gender and education which were selected by AIC.

c Model was adjusted for gender and APOE4 which were selected by AIC.

Table S17. The hazard ratio of Sleep Disturbance for the AD in the Cox regression model in the participants without elevated CSF beta.

| Fixed effects | Haz. Ratio | Std. Err. | z | *P* | *95% CI* | |
| --- | --- | --- | --- | --- | --- | --- |
| Family History of Dementia | 0.78 | 0.23 | -0.84 | 0.404 | 0.43 | 1.40 |
| Family History of AD | 1.19 | 0.36 | 0.57 | 0.567 | 0.66 | 2.15 |
| Gender | 1.39 | 0.28 | 1.63 | 0.103 | 0.94 | 2.06 |
| APOE4 | 2.47 | 0.45 | 4.90 | 0.000 | 1.72 | 3.54 |
| Education | 0.95 | 0.03 | -1.68 | 0.094 | 0.89 | 1.01 |
| Sleep Disturbance | 1.70 | 0.33 | 2.76 | 0.006 | 1.17 | 2.49 |


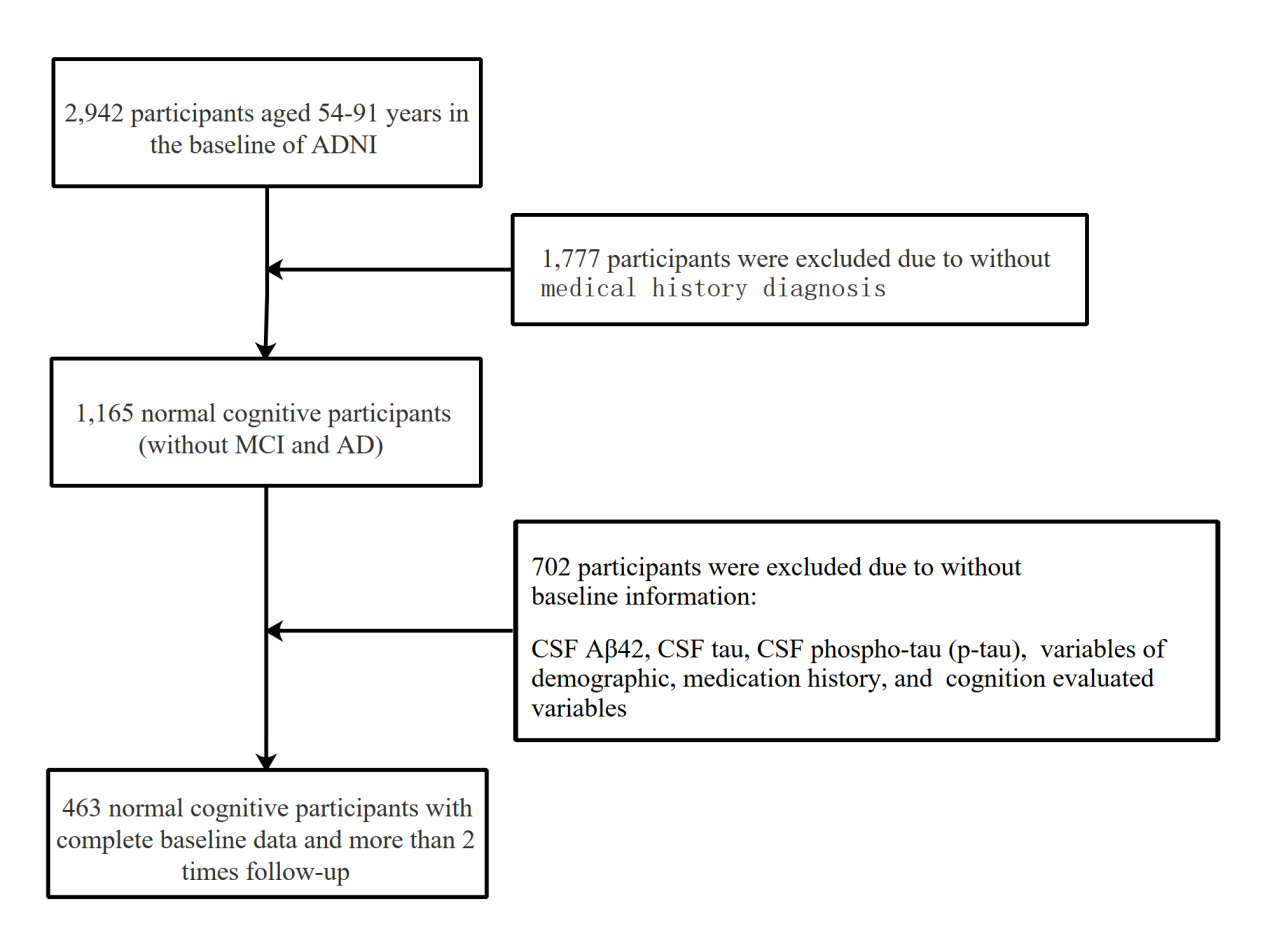


Figure S1. Study Flow Chart.
